# Supplementary material for: Optimization of the Growth Process of Double Perovskite Pr2−δNi1−xMn1+xO6−y Epitaxial Thin Films by RF Sputtering
Source: MDPI journal article supplement (doi:10.3390/ma15145046), 2022-07-20
Supplement: s1 [file s1]

Article

# Optimization of the Growth Process of Double Perovskite $\text{Pr}_{2-\delta}\text{Ni}_{1-x}\text{Mn}_{1+x}\text{O}_{6-y}$ Epitaxial Thin Films by RF Sputtering

Monica Bernal-Salamanca <sup>1,\*</sup>, Lluís Balcells <sup>1</sup>, Zorica Konstantinović <sup>2</sup>, Alberto Pomar <sup>1</sup>, Benjamín Martínez <sup>1</sup> and Carlos Frontera <sup>1</sup>

<sup>1</sup> Institut de Ciència de Materials de Barcelona, Consejo Superior de Investigaciones Científicas (ICMAB-CSIC), Campus UAB, 08193 Bellaterra, Spain; balcells@icmab.es (L.B.); apomar@icmab.es (A.P.); bejamin.martinez@icmab.es (B.M.); frontera@icmab.es (C.F.)

<sup>2</sup> Center for Solid State Physics and New Materials, Institute of Physics Belgrade, University of Belgrade, Pregrevica 68, 6080 Belgrade, Serbia; zorica@ipb.ac.rs

\* Correspondence: monakob24@gmail.com

## 1. XRD pattern of the final target of $\text{Pr}_2\text{NiMnO}_6$

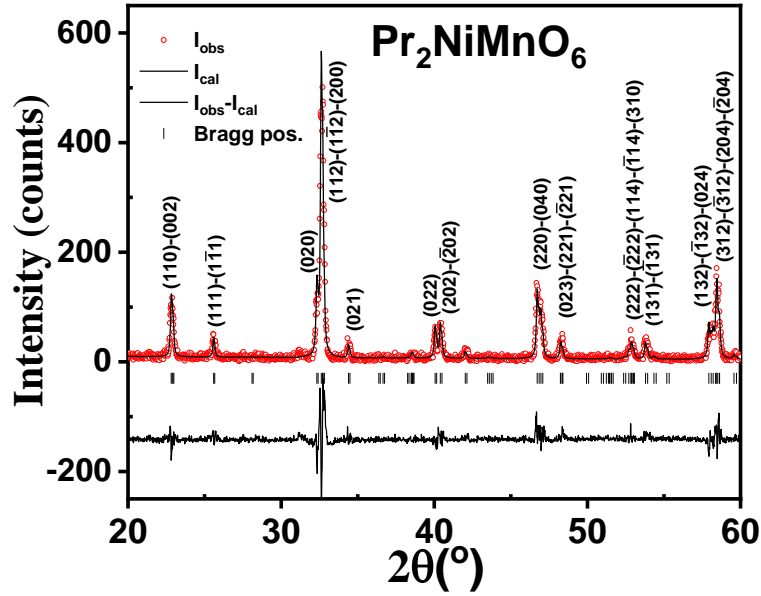

**Figure S1.** XRD pattern of the final target of  $\text{Pr}_2\text{NiMnO}_6$  prepared by solid state reaction method. The peaks clearly show the primary contribution of the PNMO phase.  $I_{\text{obs}}$ ,  $I_{\text{cal}}$  represent XRD of the observed and calculated intensities, respectively, and (l) the Bragg position.

## Optimization of growth conditions

### 1. Oxygen pressure deposition

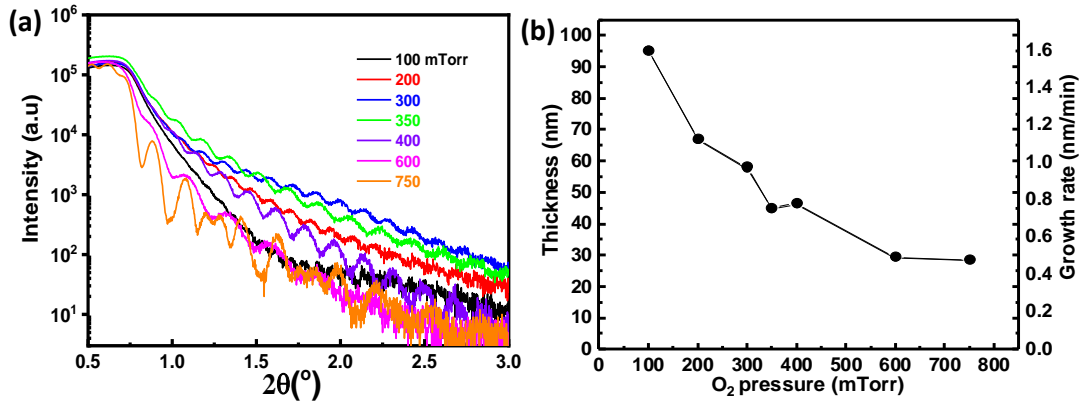

**Figure S2.** (a) XRR data of PNMO thin films on STO substrates grown at  $850^\circ\text{C}$  under different oxygen pressures ranging from 100 to 750 mTorr. (b) Thickness and growth rate as a function of oxygen pressure of the same samples.

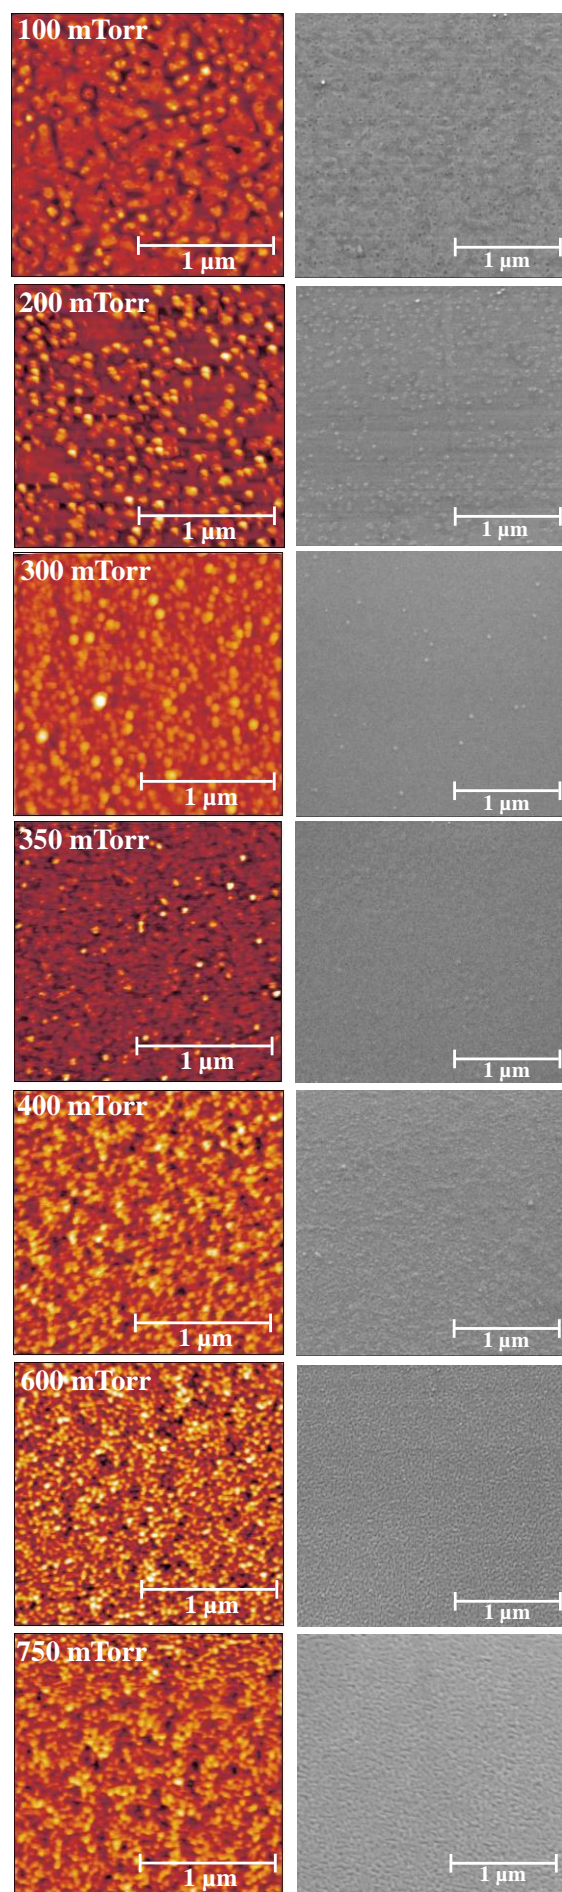

**Figure S3.** AFM topography ( $2 \times 2 \mu\text{m}^2$  area, left-hand image) and SEM micrographs of corresponding AFM images (right-hand image) of PNMO thin films grown under different oxygen pressures (ranging from 100 to 750 mTorr) at  $850^\circ\text{C}$ , with in-situ annealing at the same growth temperature (1h under 420 Torr  $\text{O}_2$ ).

## 2. Temperature deposition

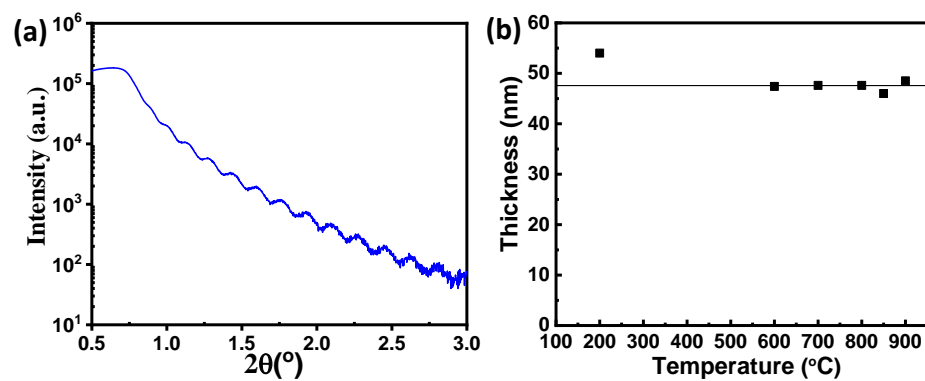

**Figure S4.** (a) XRR data of a PNMO film deposited at a temperature of 700°C under 350 mTorr O<sub>2</sub>. (b) Thickness as a function of growth temperature.

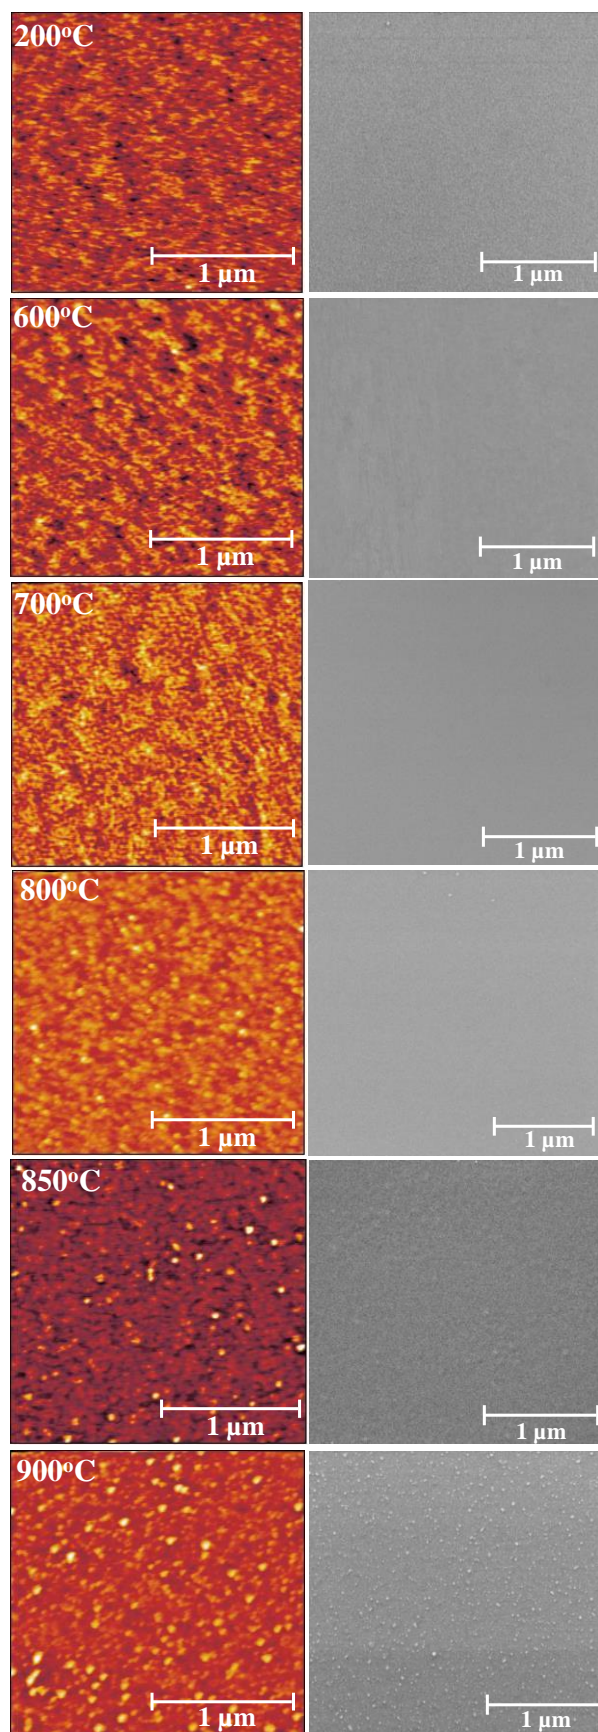

**Figure S5.** AFM topography ( $2 \times 2 \mu\text{m}^2$  area, left-hand images) and SEM micrographs of corresponding AFM images (right-hand images) of PNMO thin films grown under 350 mTorr  $\text{O}_2$  at different growth temperatures (ranging from 200°C to 900°C) with in-situ annealing at the same growth temperature (1h under 420 Torr  $\text{O}_2$ ).
